# Supplementary material
Source: ML conference proceedings conference paper supplement (https://openreview.net/forum?id=KvDedKtOX7B)
Supplement: supplementary_material [file attachment]

## A Algorithms

---

### Algorithm 1 Soft Actor Critic with Entropy Tuning

---

```

Initialize Q-functions,  $Q_{\theta_1}(s, a)$ ,  $Q_{\theta_2}(s, a)$  and policy weights  $\pi_\phi(a_t|s_t)$ 
Initialize target networks  $Q_{\bar{\theta}_1}(s, a)$ ,  $Q_{\bar{\theta}_2}(s, a)$ 
Initialize replay buffer  $D$ 
for each iteration do
  for each environment step do
    Sample action from policy  $\pi$ 
    store transition into replay buffer
  end for
  for each gradient step do
    Update Q-function using  $J_Q(\theta_i)$  for  $i \in \{1, 2\}$   $\theta_i \leftarrow \theta_i - \lambda_Q \hat{\nabla}_{\theta_i} J_Q(\theta_i)$ 
    Update policy weights using  $J_\pi(\phi)$   $\phi \leftarrow \phi - \lambda_\pi \hat{\nabla}_\phi J_\pi(\phi)$ 
    Adjust temperature using  $J(\alpha)$   $\alpha \leftarrow \alpha - \lambda \hat{\nabla}_\alpha J(\alpha)$ 
    Update target network weights using Polyak averaging  $\bar{\theta}_i \leftarrow \tau \theta_i + (1 - \tau) \bar{\theta}_i$ 
  end for
end for

```

---



---

### Algorithm 2 Prioritized Experience Replay

---

```

1: Initialize replay buffer  $D$ , exponents  $\alpha$  and  $\beta$ 
2: for step  $t, \dots, T$  do
3:   Choose action  $a_t \sim \pi_\phi(s_t)$ 
4:   Observe  $s_{t+1}, r_{t+1}$ 
5:   Store transition  $(a_t, s_t, r_{t+1}, s_{t+1})$  in  $D$ 
6:   assign maximal priority  $p_t = \max_{i < t} p_i$ 
7:   for sample  $k, \dots, K$  do
8:     Sample transition  $k$  under equation 6
9:     Compute TD Error for samples using:  $\delta_k = r_{k+1} + \gamma \max_{a \in A} Q_{\theta^-}(s_{k+1}, a) - Q_\theta(s_k, a_k)$ 
10:     $p(k) = \delta_k + \epsilon$ 
11:     $P(k) \leftarrow \frac{p(k)^\alpha}{\sum_i p(i)^\alpha}$ 
12:     $w_k = (\frac{1}{N} \cdot \frac{1}{P(k)})^\beta$ 
13:   end for
14:   take  $K$  gradient steps to minimize Bellman error weighted by  $w_k$ 
15: end for

```

---

---

**Algorithm 3** Emphasizing Recent Experience

---

```
1: Initialize Replay Buffer  $D$ , set  $\eta_t = \eta_0$ , episode length  $K = 0$ 
2: for  $t=1, \dots, T$  do
3:   Choose action  $a_t \sim \pi_\phi(s_t)$ 
4:   Observe  $s_{t+1}, r_{t+1}$ 
5:   Store transition  $(a_t, s_t, r_{t+1}, s_{t+1})$  in  $D$ 
6:    $\eta_t \leftarrow \eta_0 + (\eta_T - \eta_0) \cdot \frac{1}{T}$ 
7:    $t \leftarrow t + 1, K \leftarrow K + 1$ 
8:   if  $s_{t+1}$  is a terminal state then
9:     for step  $k$  in  $K$  mini-batch update do
10:       $c_k = \max(N \cdot \eta^{k \frac{1000}{K}}, 5000)$ 
11:       $B \sim D_{c_k}$ 
12:      Perform Gradient step on  $B$ 
13:    end for
14:     $K = 0$ 
15:   end if
16: end for
```

---

**B Hyperparameters**

| Parameter                                                                  | Value                    |
|----------------------------------------------------------------------------|--------------------------|
| <b>SAC</b>                                                                 |                          |
| Optimizer                                                                  | Adam (Kingma & Ba, 2017) |
| learning rate                                                              | $3 \cdot 10^{-4}$        |
| discount( $\gamma$ )                                                       | 0.99                     |
| replay buffer size                                                         | $10^6$                   |
| entropy target                                                             | $-\dim(A)$               |
| nonlinearity                                                               | ReLU                     |
| target smoothing coefficient( $\tau$ )                                     | 0.005                    |
| target update interval                                                     | 1                        |
| gradient steps                                                             | 1                        |
| <b>PER</b>                                                                 |                          |
| initial prioritized experience replay buffer exponents ( $\alpha, \beta$ ) | (0.5,0.4)                |
| <b>ERE</b>                                                                 |                          |
| initial recency emphasis coefficient                                       | 0.996                    |
| terminal recency emphasis coefficient                                      | 1.0                      |

Table 2: SAC, PER, and ERE hyperparameters

## C Experiments

### C.1 Experiments on baseline performance in continuous control

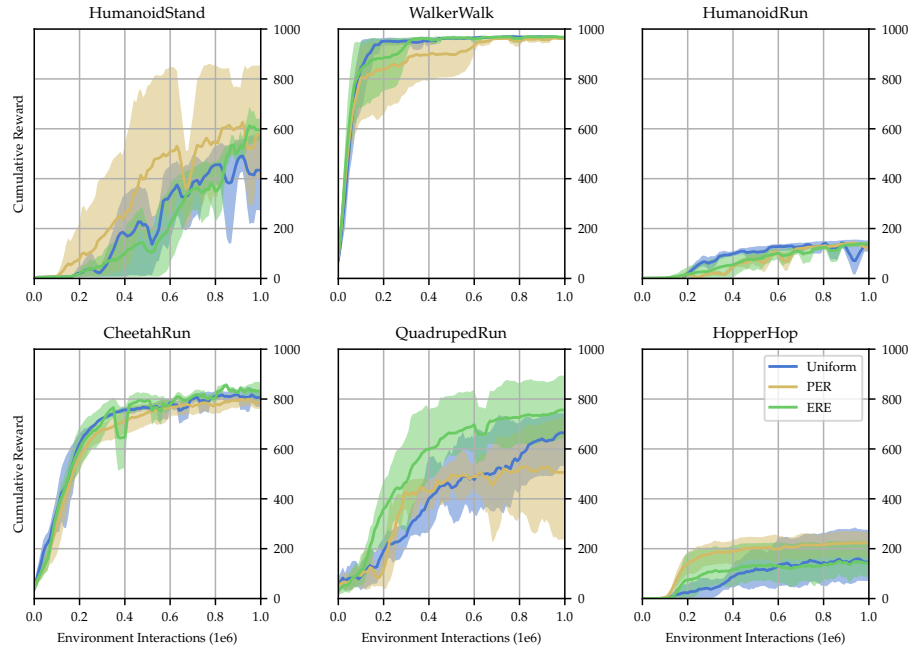

Figure 8: Detailed learning curves of Uniform (blue), PER (yellow), and ERE (green) on 6 Deepmind Control tasks. The solid lines are the median scores while the shaded area denotes the interquartile range across 5 random seeds

## C.2 Experiments on sampling methods with added reward noise

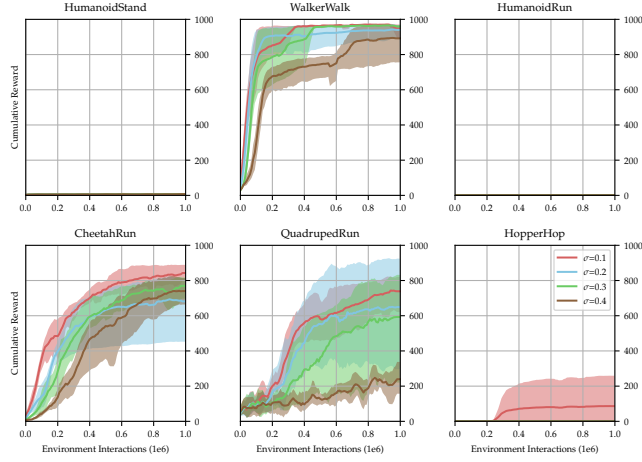

(a) Gaussian reward noise

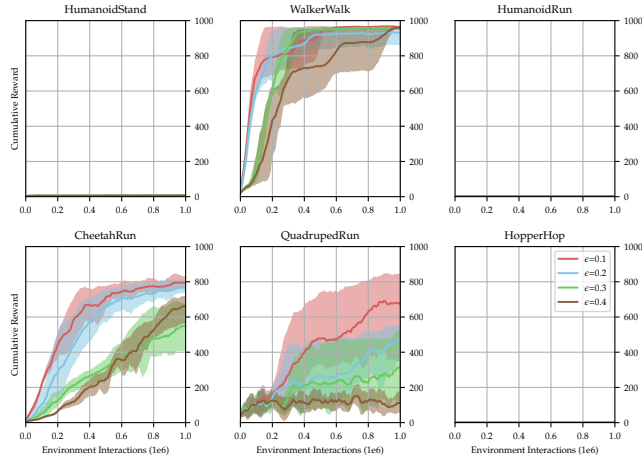

(b) Uniform reward noise

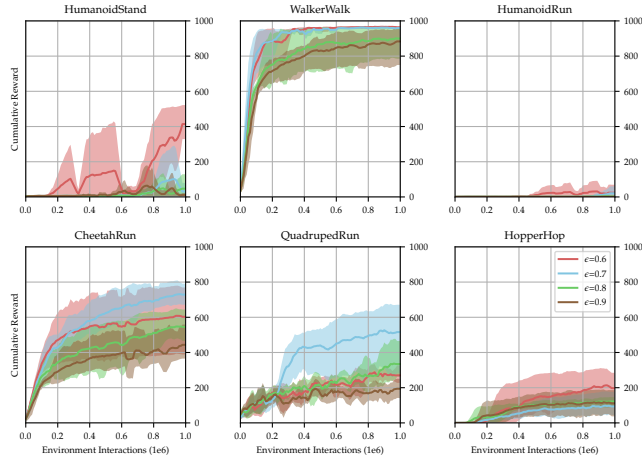

(c) Sparse reward noise

Figure 9: Learning curves for a) Gaussian, b) Uniform, and c) Sparse added reward noise under Uniform sampling. The shaded area corresponds to the interquartile range across 5 random seeds. In some environment the addition of noise results to catastrophic failure leading to close to 0 cumulative reward

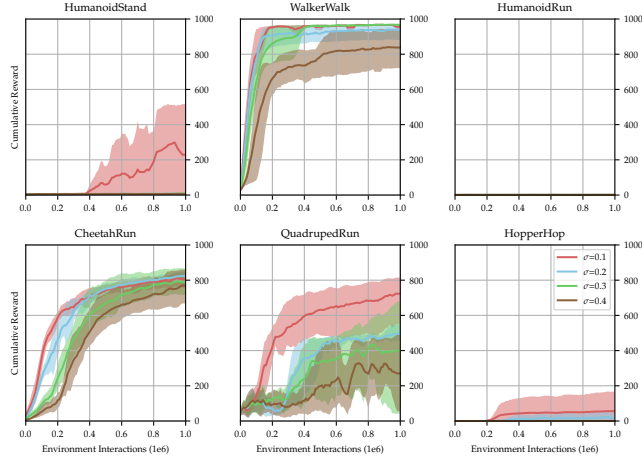

(a) Gaussian reward noise

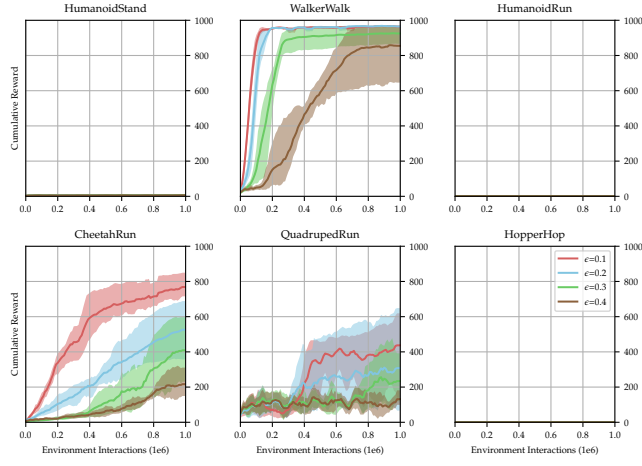

(b) Uniform reward noise

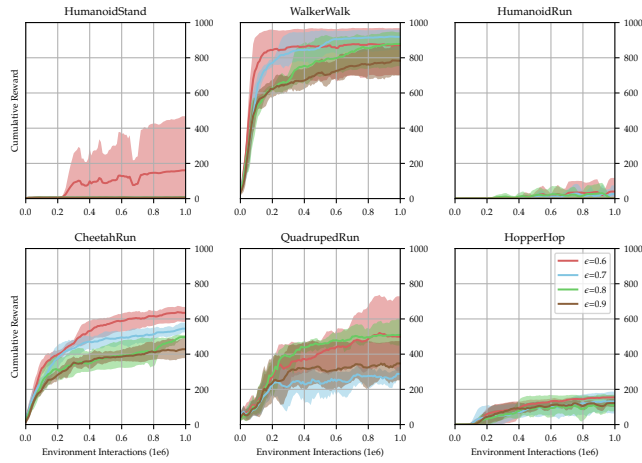

(c) Sparse reward noise

Figure 10: Learning curves for a) Gaussian, b) Uniform, and c) Sparse added reward noise with PER

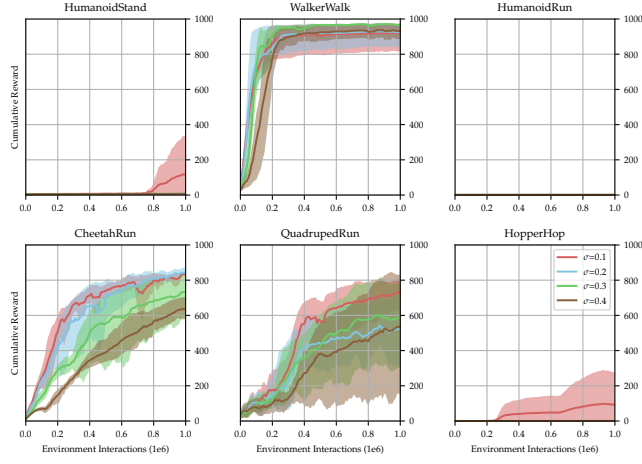

(a) Gaussian reward noise

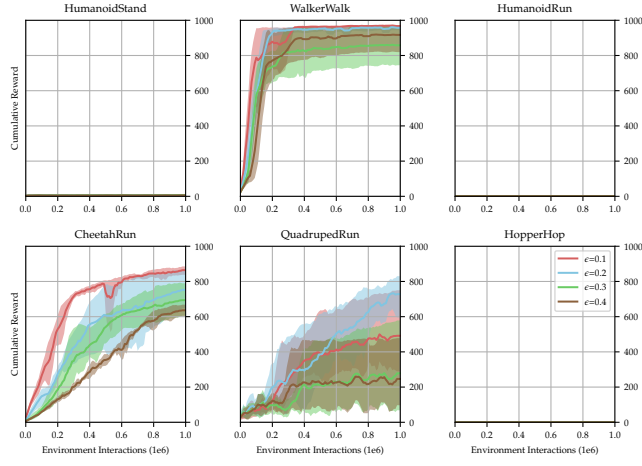

(b) Uniform reward noise



(c) Sparse reward noise

Figure 11: Learning curves for a) Gaussian, b) Uniform, and c) Sparse added reward noise with ERE

### C.3 Experiments on replay buffer sensitivity analysis

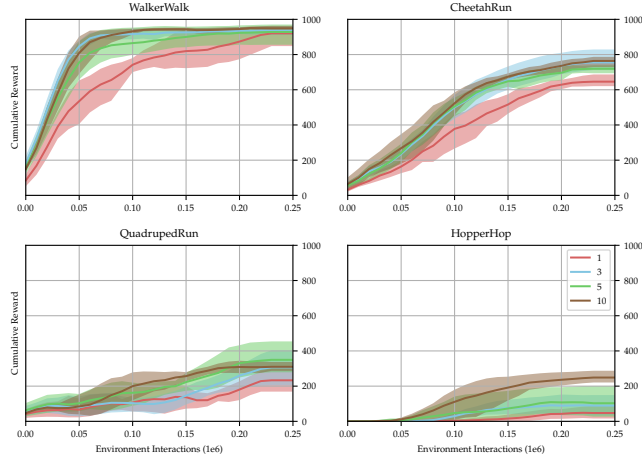

(a) Uniform

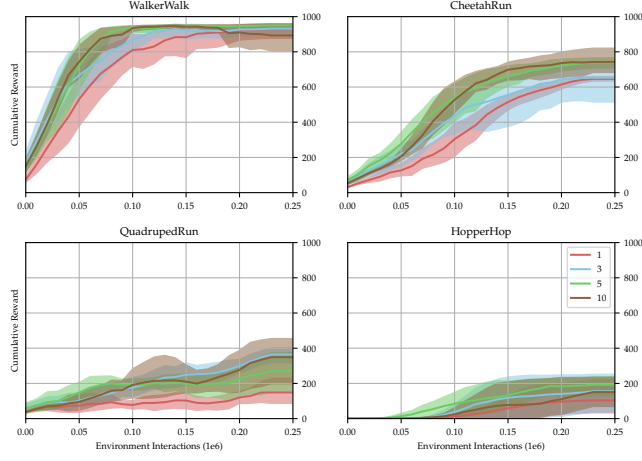

(b) PER

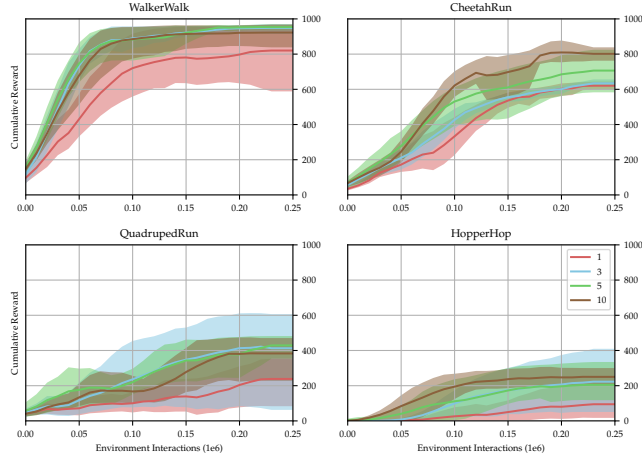

(c) ERE

Figure 12: Learning curves for varying number of policy updates over  $0.25 \cdot 10^6$  environment interactions for a) Uniform sampling, b) PER, c) ERE. The shaded area corresponds to the interquartile range across 5 random seeds

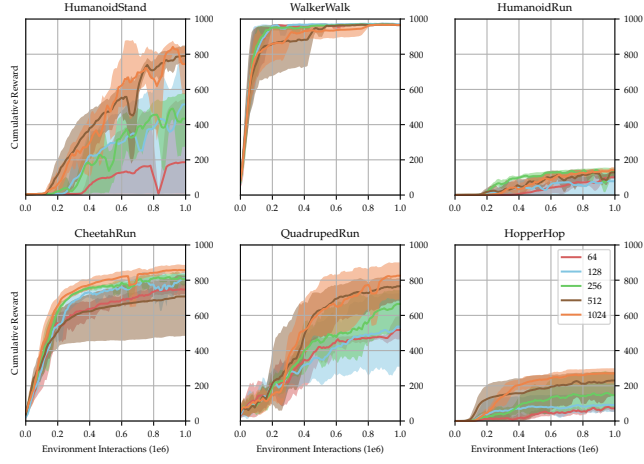

(a) Uniform

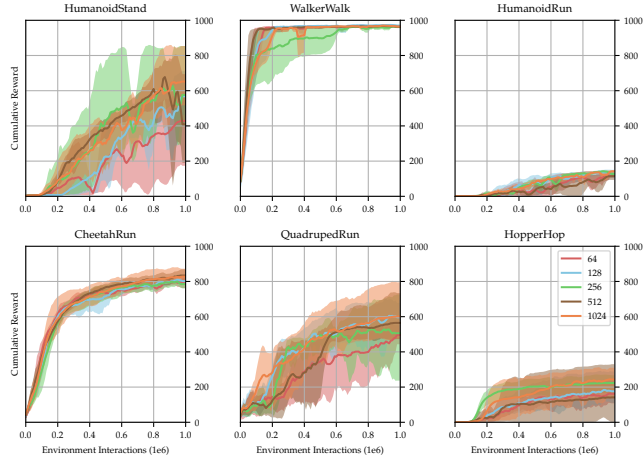

(b) PER

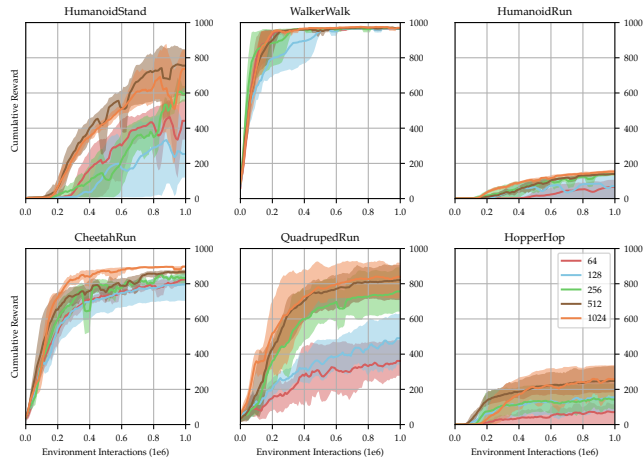

(c) ERE

Figure 13: Learning curves for varying batch size for a) Uniform sampling, b) PER, c) ERE



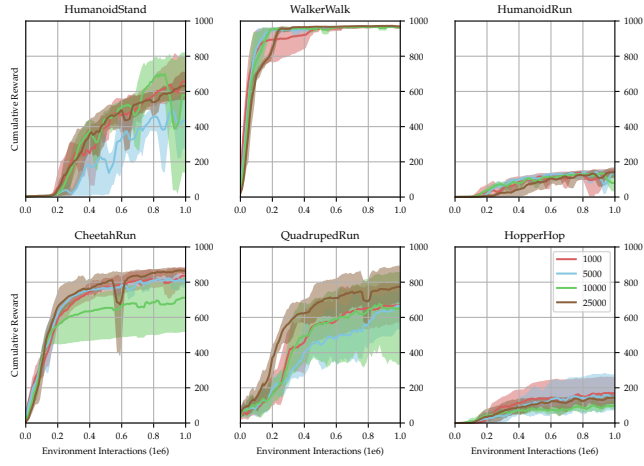

(a) Uniform

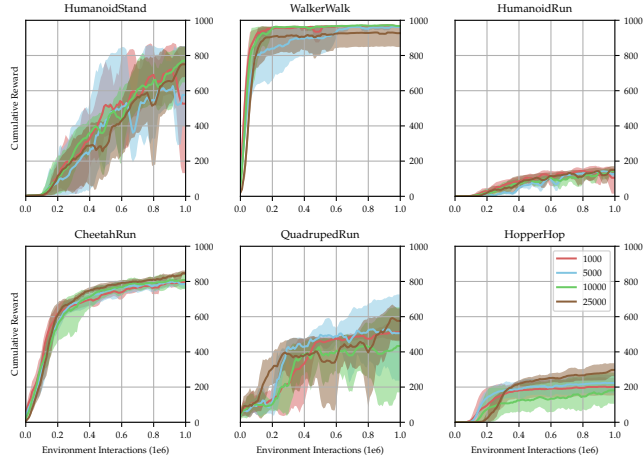

(b) PER

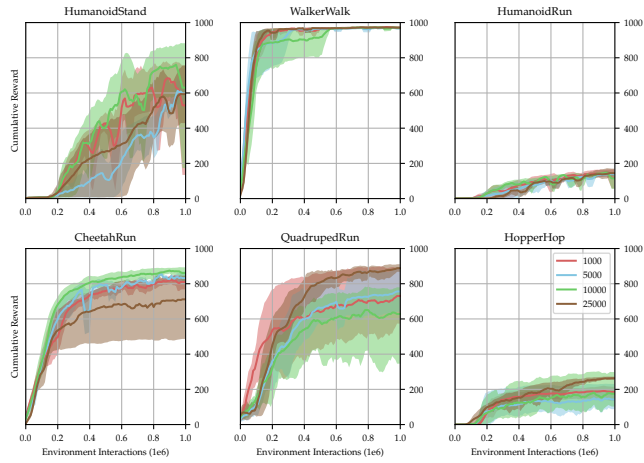

(c) ERE

Figure 14: Learning curves for varying exploration steps for a) Uniform sampling, b) PER, c) ERE

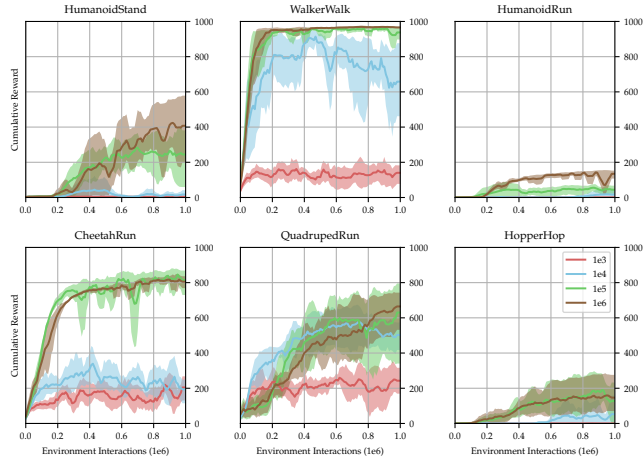

(a) Uniform

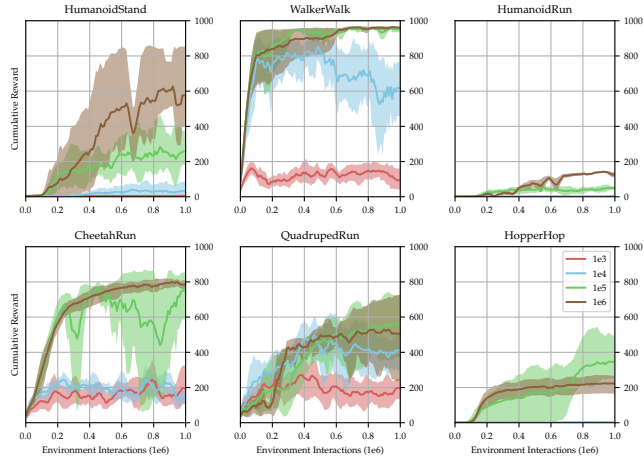

(b) PER

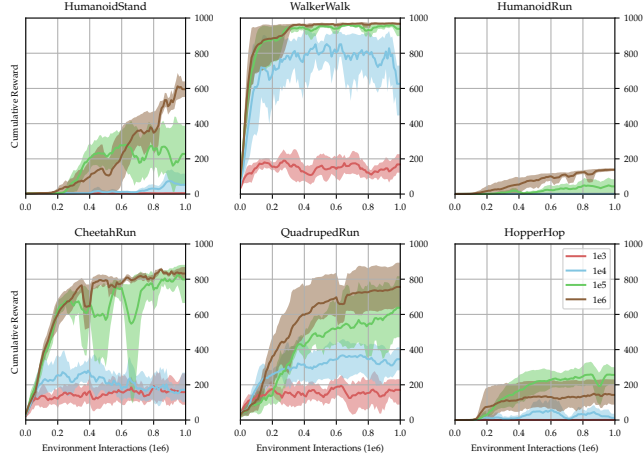

(c) ERE

Figure 15: Learning curves for varying replay buffer capacity for a) Uniform sampling, b) PER, c) ERE.

## C.4 Experiments on separate sampling methods per Actor-Critic and varying priority metrics

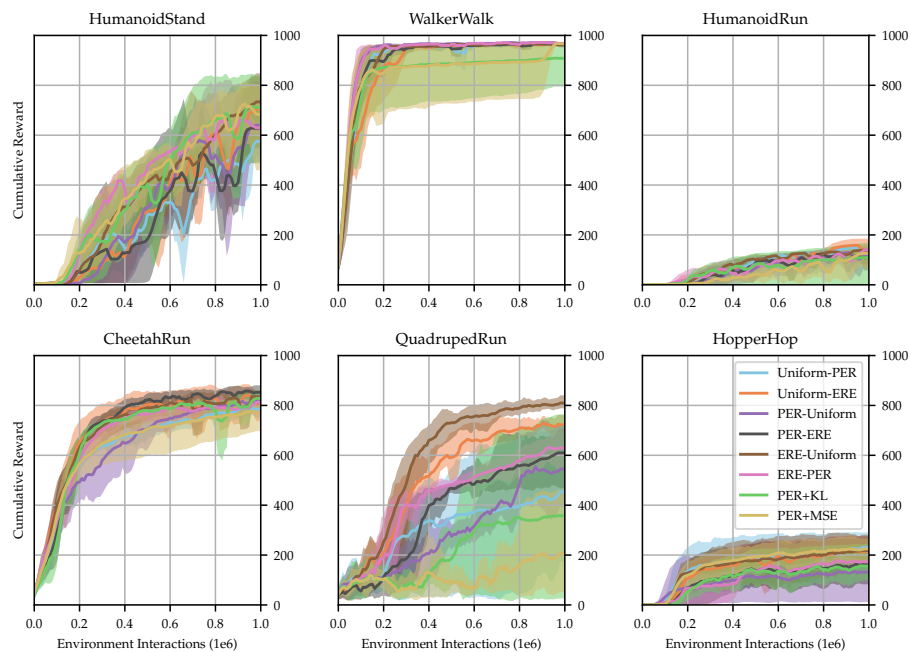

Figure 16: Learning curves of separate sampling methods per Actor-Critic and PER with different prioritization metrics (MSE, KL divergence). The shaded area corresponds to the interquartile range across 5 random seeds
